# Supplementary material for: Electrostatic Insect Repulsion, Capture, and Arc-Discharge Techniques for Physical Pest Management in Greenhouses
Source: MDPI journal article supplement (doi:10.3390/agronomy13010023), 2022-12-21
Supplement: s1 [file s1]

Figure S1

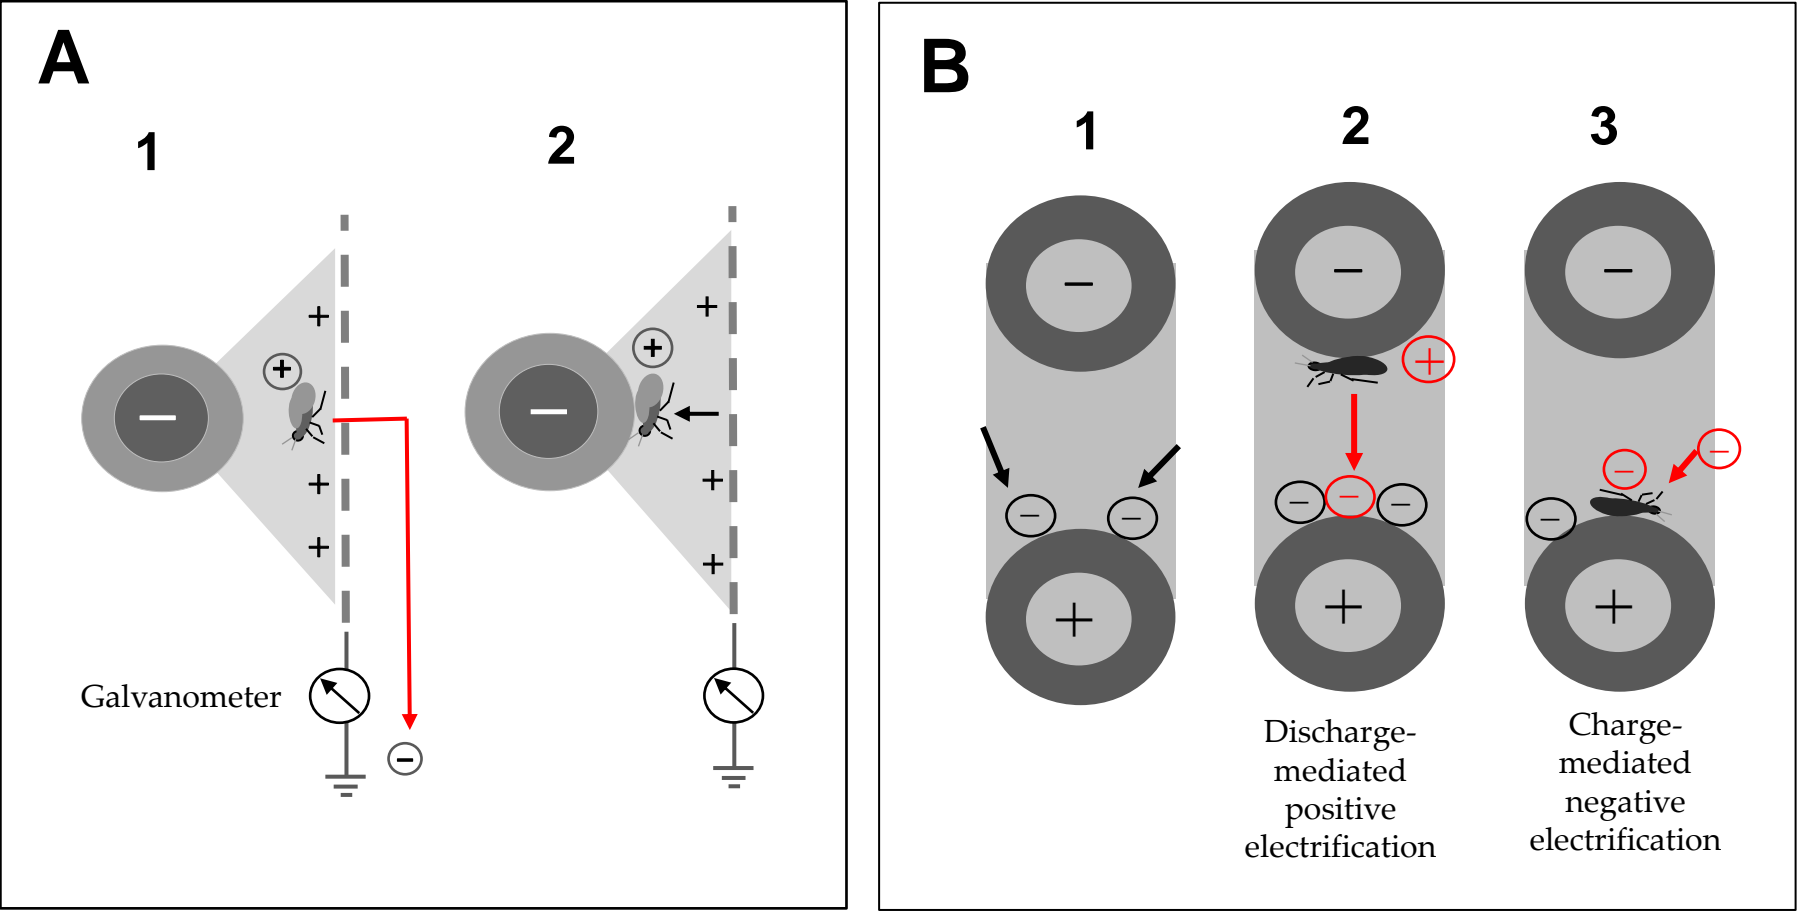

**Figure S1.** (A) Schematic representation of insect capture by discharge-mediated positive electrification of the insect in the static electric field of a single-charged dipolar electric field screen (SD screen). (B) Schematic representation of the insect capture mechanism in the static electric field of the double-charged dipolar electric field screen (DD screen).
