# Supplementary material for: Electrostatic Insect Repulsion, Capture, and Arc-Discharge Techniques for Physical Pest Management in Greenhouses
Source: MDPI journal article supplement (doi:10.3390/agronomy13010023), 2022-12-21
Supplement: s1 [file s1]

Archive with 10 entries (10 files):
- Figure S1.pdf
- Figure S2.pdf
- Figure S3.pdf
- Table S1.pdf
- Video S1.mp4
- Video S2.mp4
- Video S4.mp4
- Video S5.mp4
- Video S3.mp4
- Figure S4.pdf
