# Supplementary material for: Electrostatic Insect Repulsion, Capture, and Arc-Discharge Techniques for Physical Pest Management in Greenhouses
Source: MDPI journal article supplement (doi:10.3390/agronomy13010023), 2022-12-21
Supplement: s1 [file s1 › Figure S3.pdf]

Figure S3

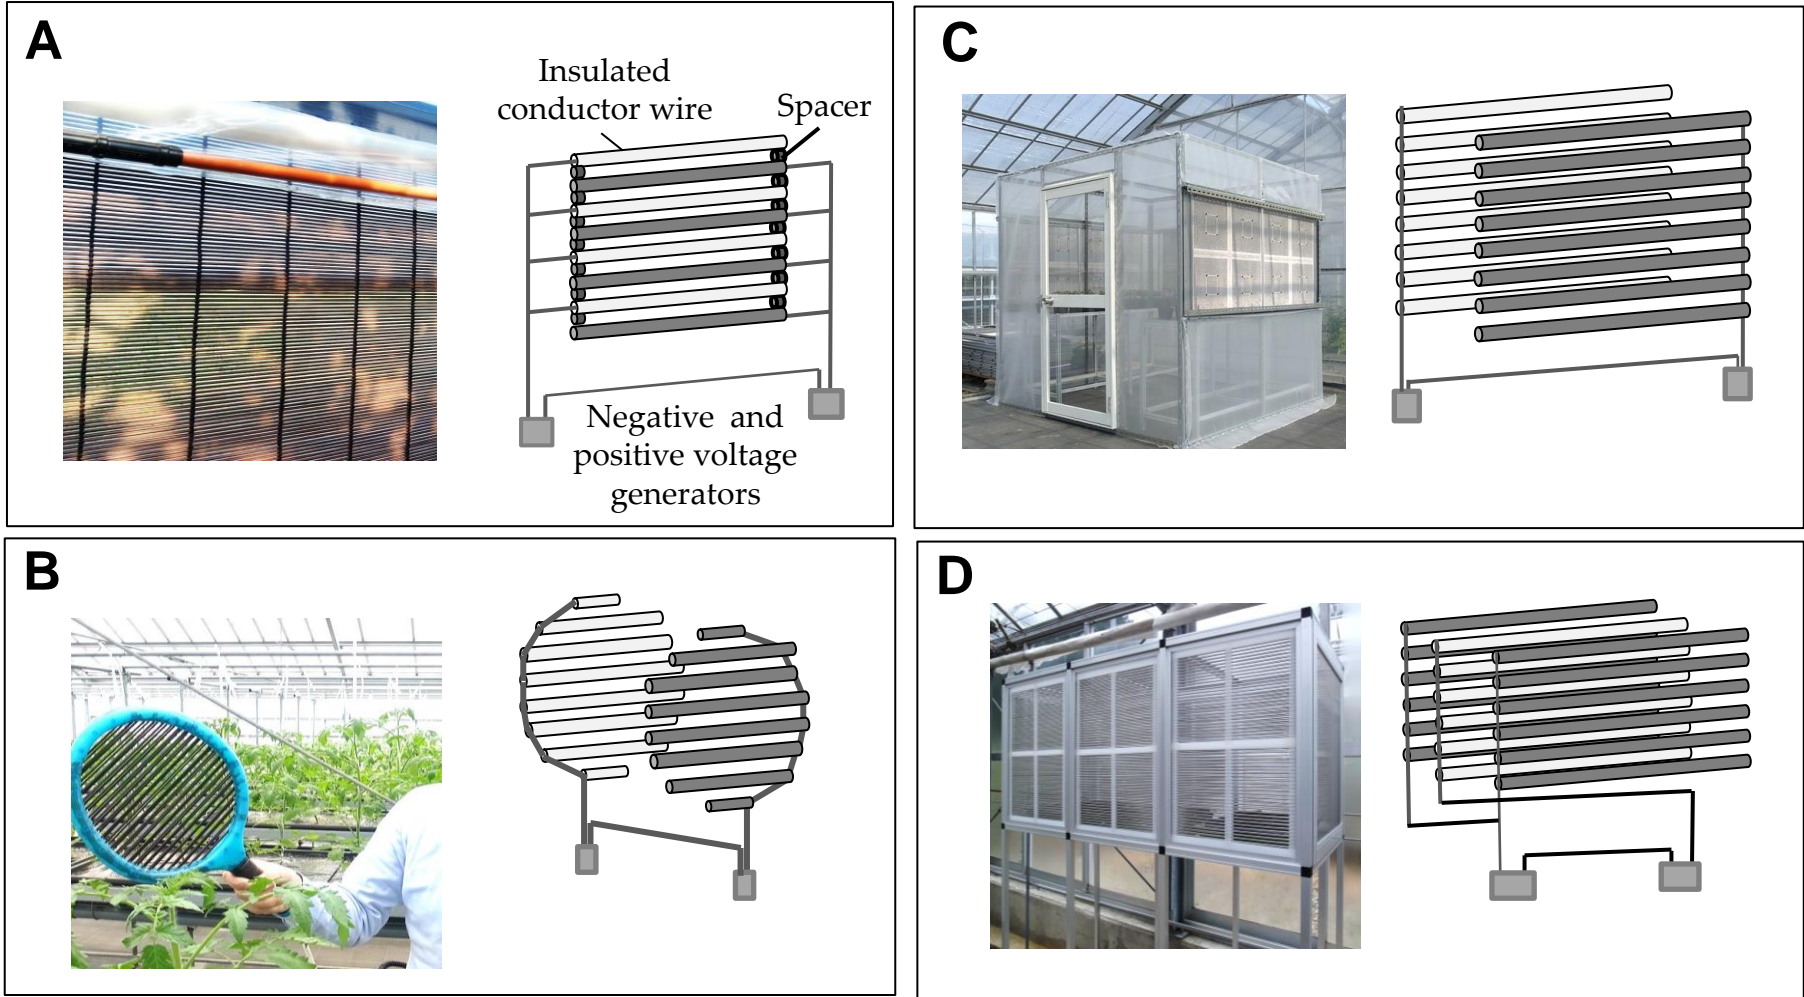

**Figure S3.** Photograph and schematic representation of a bamboo blind-type electric field screen (A), an electrostatic flying insect catcher (B), an electrostatic cabinet (C), and an electrostatic nursery shelter (D).
