# Supplementary material for: Electrostatic Insect Repulsion, Capture, and Arc-Discharge Techniques for Physical Pest Management in Greenhouses
Source: MDPI journal article supplement (doi:10.3390/agronomy13010023), 2022-12-21
Supplement: s1 [file s1 › Figure S4.pdf]

**Figure S4**

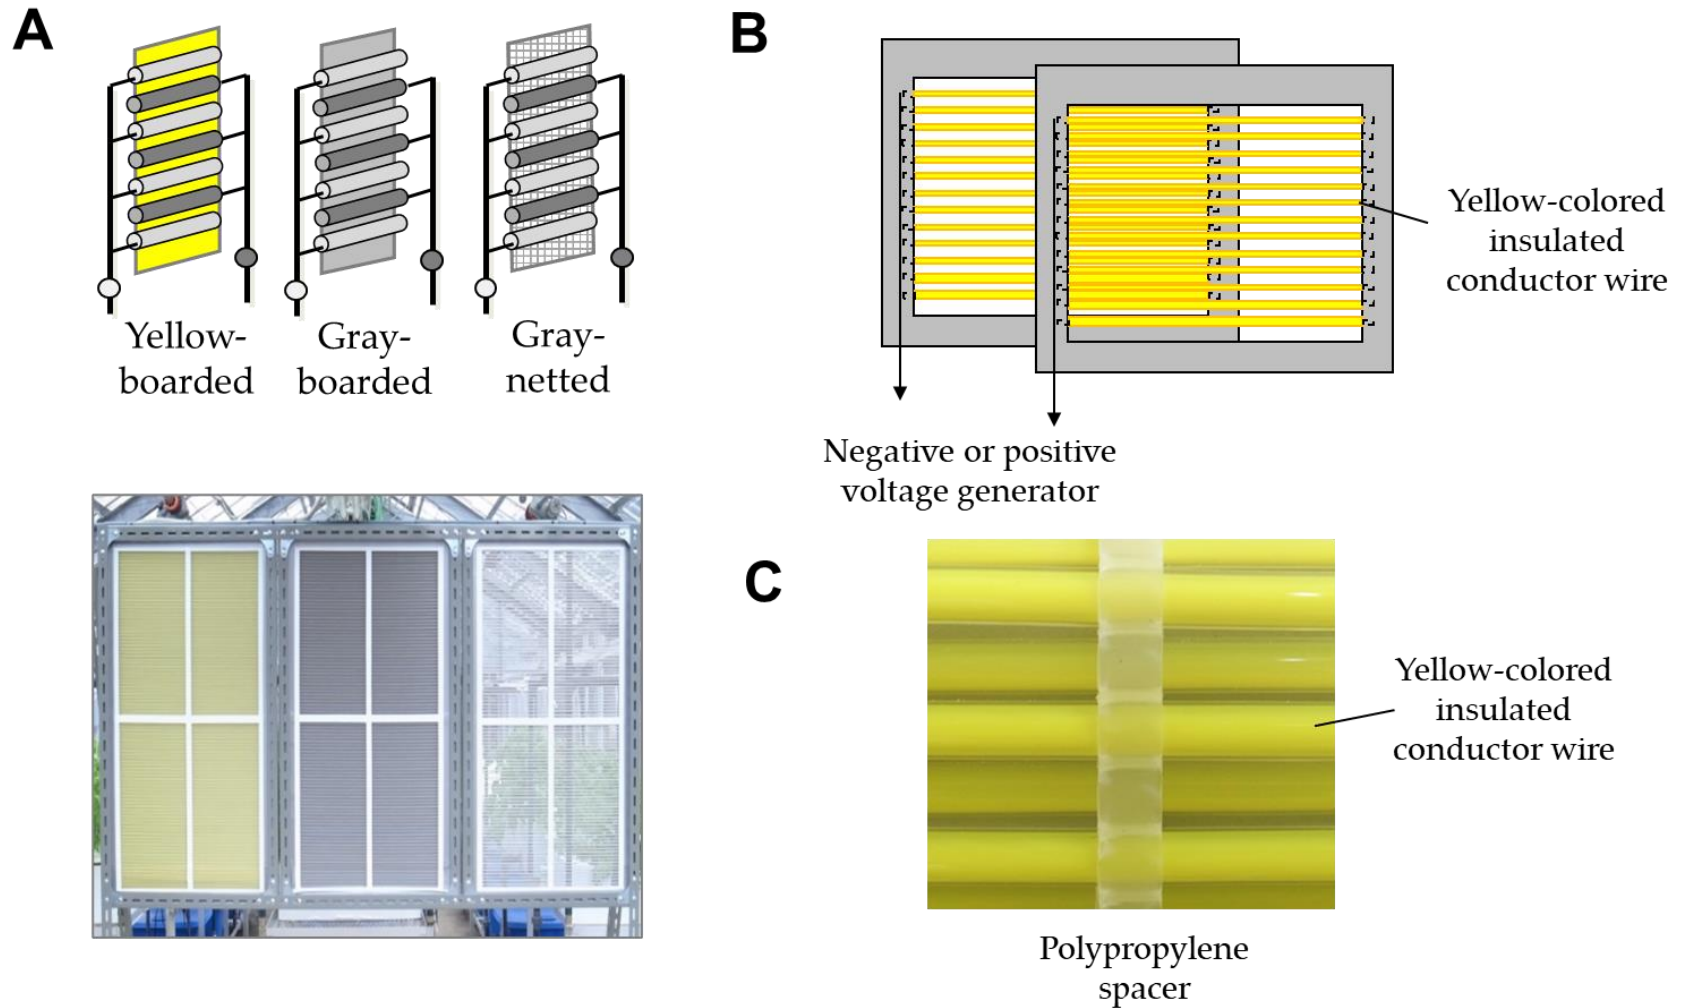

**Figure S4.** (A) Three types of single-layered DD screen examined during a greenhouse assay. Three single-layered screens backed with yellow board, gray board, or gray net (left to right) were fixed by a metal frame and placed in a greenhouse, in which 50 tomato plants were heavily infested by numerous whiteflies, for 1 month. (B) Schematic representation of a DD screen consisting of two identical SM screen units with an insulating coating (transparent soft polyvinyl chloride tube) filled with yellow-colored water. (C) Transparent tubes with yellow-colored water arranged in an offset configuration.
