# Supplementary material for: Electrostatic Insect Repulsion, Capture, and Arc-Discharge Techniques for Physical Pest Management in Greenhouses
Source: MDPI journal article supplement (doi:10.3390/agronomy13010023), 2022-12-21
Supplement: s1 [file s1 › Table S1.pdf]

**Table S1.** Capture of insect pests blown toward insulated conductor wires of different types of double-charged dipolar electric field screens (DD screens)

| Insect pests tested     | Voltage required to completely capture insects (-kV) |     |     |                  |     |     |                    |     |                |
|-------------------------|------------------------------------------------------|-----|-----|------------------|-----|-----|--------------------|-----|----------------|
|                         | Single-layered type                                  |     |     | Two-layered type |     |     | Three-layered type |     |                |
|                         | 1                                                    | 2   | 3   | 1                | 2   | 3   | 1                  | 2   | 3 <sup>a</sup> |
| Whiteflies              | 0.8                                                  | 1   | 1.2 | 0.8              | 0.8 | 0.8 | 0.8                | 0.8 | 0.8            |
| Green peach aphids      | 1                                                    | 1   | 1.2 | 0.8              | 1   | 1   | 0.8                | 1   | 1              |
| Western flower thrips   | 1.5                                                  | 2   | 2   | 0.8              | 1   | 1   | 0.8                | 1   | 1              |
| Tomato leaf miner flies | 1.2                                                  | 1.5 | 1.5 | 1                | 1   | 1.2 | 1                  | 1   | 1.2            |

<sup>a</sup> Wind velocity (m/s).
